# Supplementary material
Source: HighWire-hosted journal article supplement (https://bmjopen.bmj.com/content/9/12/e032925)
Supplement: inline-supplementary-material-1 [file inline-supplementary-material-1.pdf]

Sample N,18.0117285.Q (BLOOD) Collected 29 Jul 2018 22:36 Received 29 Jul 2018 23:06

**U&E**

|                             |   |     |        |           |
|-----------------------------|---|-----|--------|-----------|
| <b>Sodium</b>               |   | 137 | mmol/L | 133 - 146 |
| <b>Potassium</b>            |   | 4.4 | mmol/L | 3.5 - 5.3 |
| <b>Chloride</b>             |   | 108 | mmol/L | 95 - 108  |
| <b>Bicarbonate</b>          | * | 21  | mmol/L | 22 - 29   |
| <b>Urea</b>                 | * | 8.6 | mmol/L | 2.5 - 7.8 |
| <b>Enzymatic Creatinine</b> | * | 203 | umol/L | 49 - 90   |

\*\*\*\*\* AKI STAGE 2 \*\*\*\*\*

Please refer to Trust AKI guideline on Intranet
